# Supplementary material for: Significant inhibition of secondary pollution in the catalytic oxidation of chloroaromatics over a bifunctional Ru1/CeO2 single-atom catalyst
Source: Royal Society of Chemistry journal article supplement (doi:10.1039/d3ta06969a), 2023-12-18
Supplement: d3ta06969a1.pdf [file d3ta06969a1.pdf]

## Supporting Information

### Significant inhibition of secondary pollution in the catalytic oxidation of chloroaromatics over a bifunctional Ru<sub>1</sub>/CeO<sub>2</sub> single-atom catalyst

Yu Wang<sup>‡,[a]</sup>, Zhang Liu<sup>‡,[c]</sup>, Yao Wei<sup>‡,[d,e]</sup>, Yiming Hu<sup>[f]</sup>, Yi Chen<sup>[a,f]</sup>, Bin Shan<sup>\*[c]</sup> and Bo Wu<sup>\*[b,g]</sup>

[a] College of Resources and Environment Engineering, Wuhan University of Science and Technology, Wuhan 430081, P. R. China

[b] CAS Key Laboratory of Low-Carbon Conversion Science and Engineering, Shanghai Advanced Research Institute, Chinese Academy of Sciences, Shanghai 201210, P. R. China.  
wubo0422@ustc.edu.cn

[c] State Key Laboratory of Materials Processing and Die and Mould Technology, School of Materials Science and Engineering, Huazhong University of Science and Technology, Wuhan, 430074, P. R. China. bshan@mail.hust.edu.cn

[d] Shanghai Institute of Applied Physics, Chinese Academy of Sciences, Shanghai 201204, P. R. China

[e] University of Chinese Academy of Sciences, Beijing 100049, P. R. China

[f] Tongxiang Ties Environmental Energy co., Ltd., Jiaxing 314500, P. R. China

[g] Hefei National Laboratory for Physical Sciences at the Microscale, University of Science and Technology of China, Hefei, Anhui 230026, P. R. China

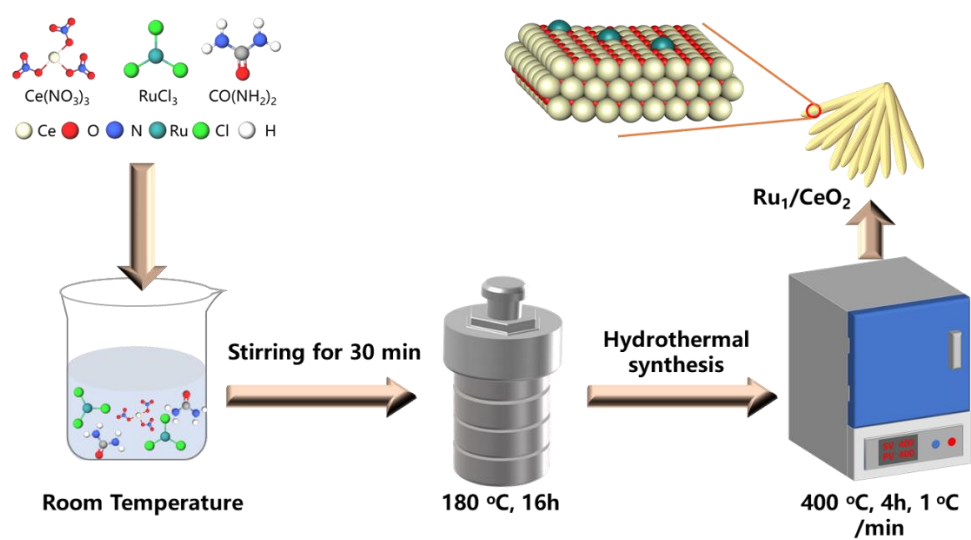

**Figure S1.** Schematic illustrations of the preparation of  $\text{Ru}_1/\text{CeO}_2$  catalyst.

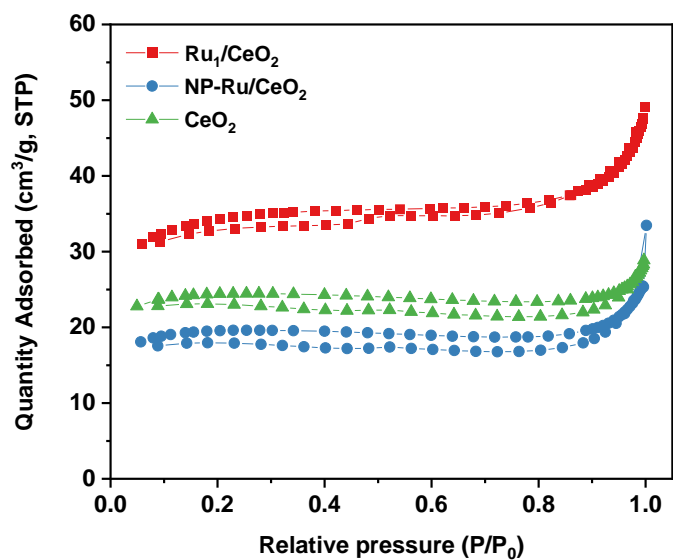

**Figure S2.** N<sub>2</sub> adsorption-desorption isothermal of CeO<sub>2</sub>, Ru<sub>1</sub>/CeO<sub>2</sub> and NP-Ru/CeO<sub>2</sub>.

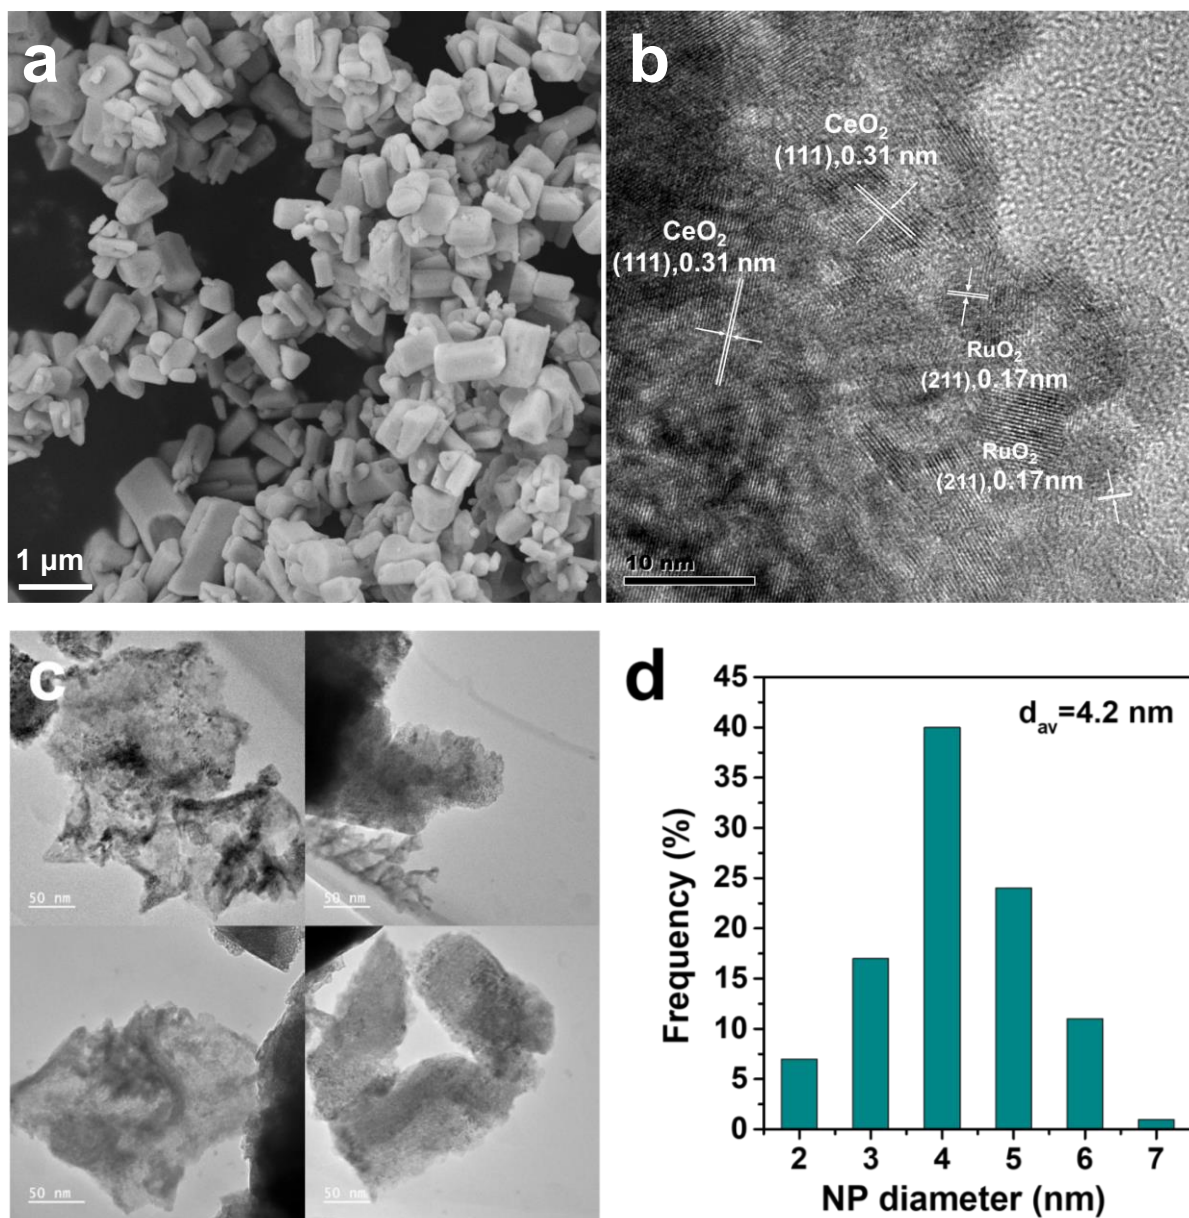

**Figure S3.** (a) SEM, (b) HRTEM, (c) TEM images and (d) histogram of RuO<sub>2</sub> NPs particle size for NP-Ru/CeO<sub>2</sub>.

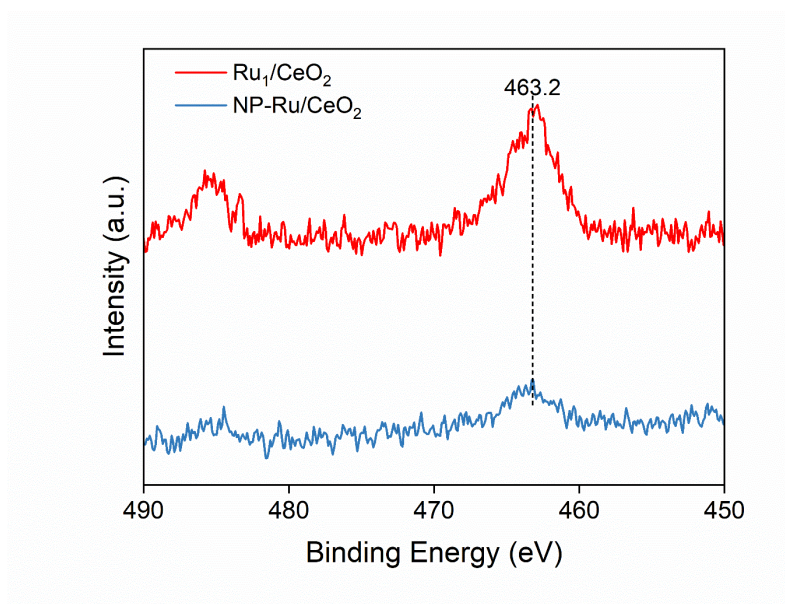

**Figure S4.** Ru 2p spectra of Ru<sub>1</sub>/CeO<sub>2</sub> and NP-Ru/CeO<sub>2</sub>.

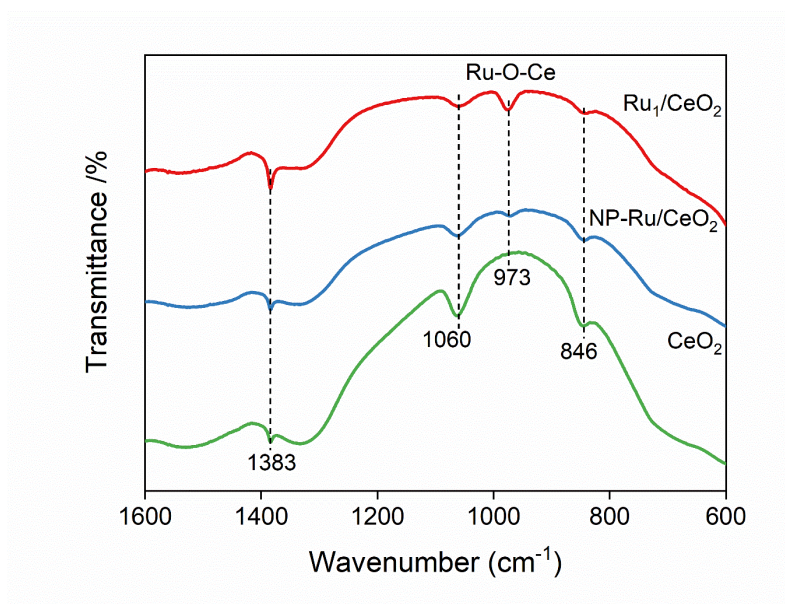

**Figure S5.** FTIR spectrum for CeO<sub>2</sub>, Ru<sub>1</sub>/CeO<sub>2</sub>, and NP-Ru/CeO<sub>2</sub>.

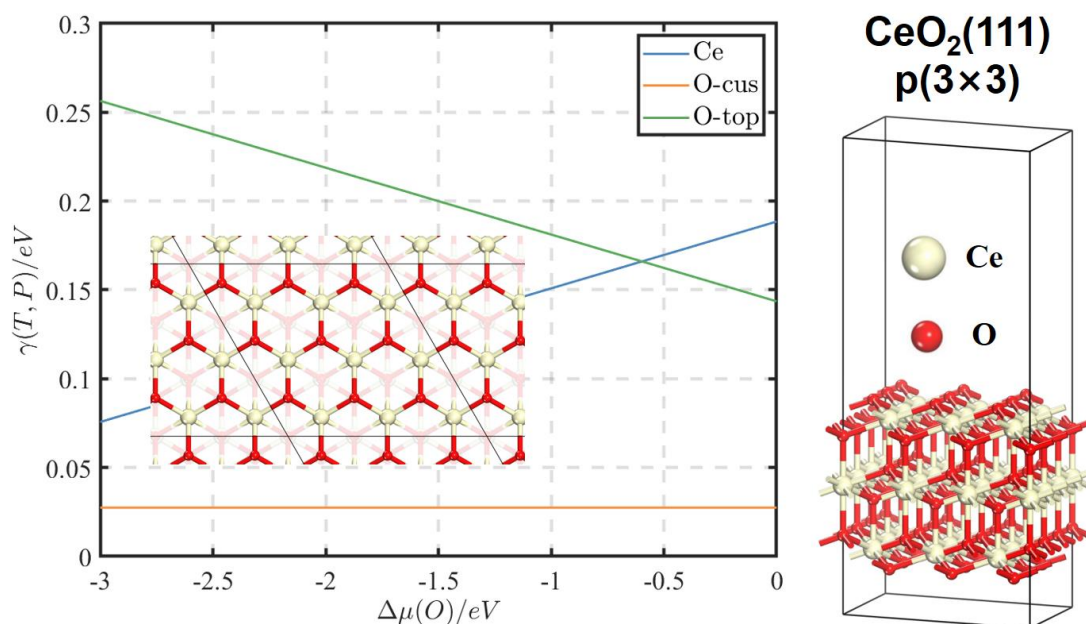

**Figure S6.** O chemical potential calculation showed that  $\text{CeO}_2(111)$  exposed the O-cus to seal under experimental conditions. a  $\text{CeO}_2(111)$  p(3x3) slab model was established with 9 layers of atoms, 3 layers under fixed, and a 15 Å vacuum layer.

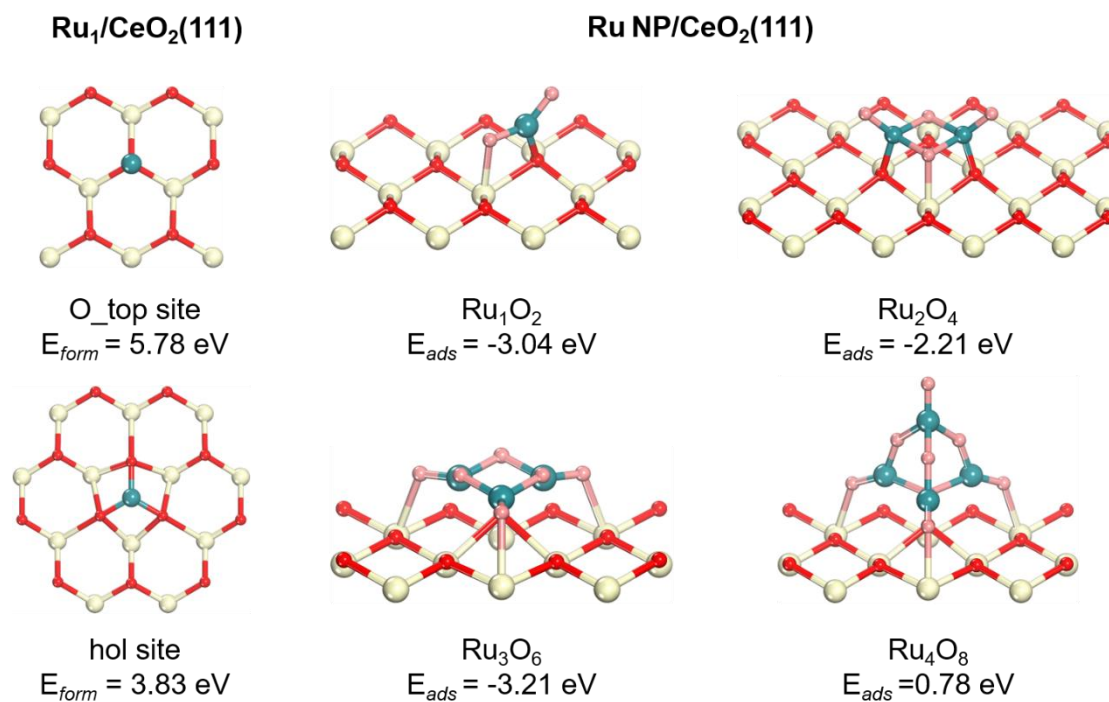

**Figure S7.** Ru atoms tend to bind to the hollow site formed by 3 O atoms of  $\text{CeO}_2(111)$ . As for  $(\text{RuO}_2)_n/\text{CeO}_2(111)$ , when  $n=3$ , the configuration of the  $\text{Ru}_3\text{O}_6$  cluster loaded by  $\text{CeO}_2(111)$  is the most stable model.



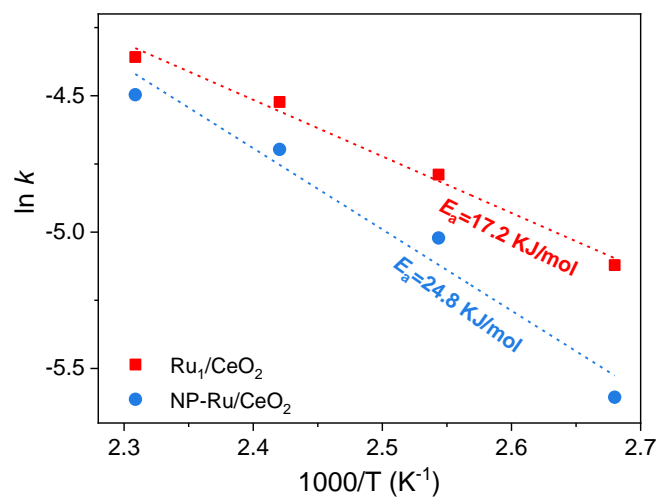

**Figure S8.** Arrhenius plots and apparent activation energy ( $E_a$ ) of Ru<sub>1</sub>/CeO<sub>2</sub> and NP-Ru/CeO<sub>2</sub>, respectively. Reaction conditions: 1000 ppm CB/5 vol.% H<sub>2</sub>O/air.

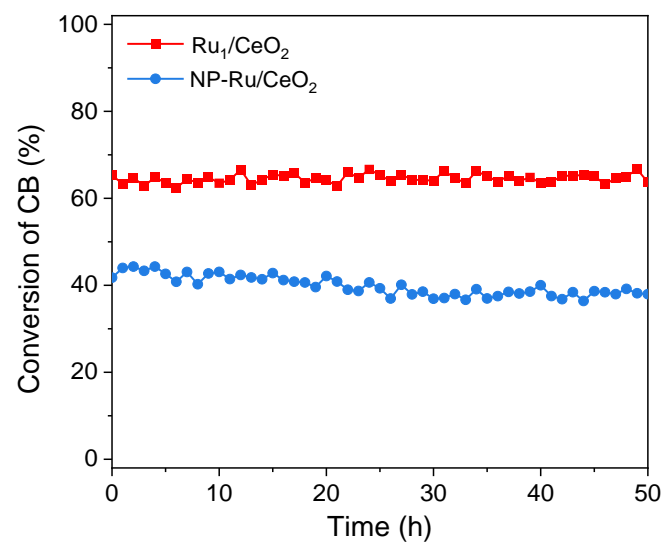

**Figure S9.** Long-term stability tests of CB oxidation tested at 200 °C over Ru<sub>1</sub>/CeO<sub>2</sub> and

NP-Ru/CeO<sub>2</sub>.

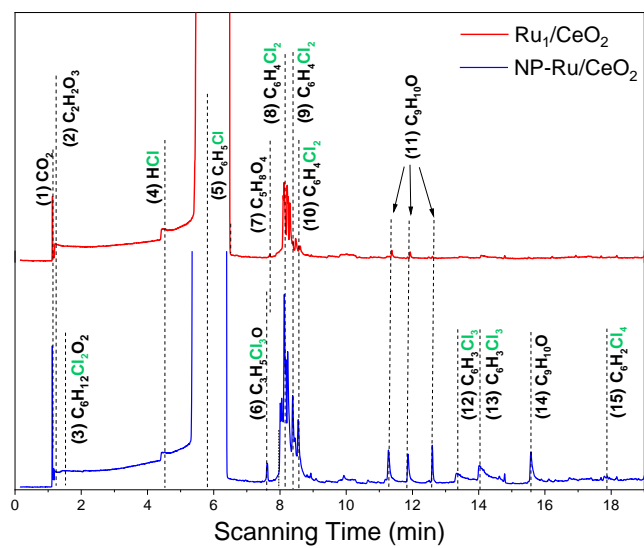

**Figure S10.** Possible reaction intermediate products detected by GC-MS during the CB oxidation at 240 °C over Ru<sub>1</sub>/CeO<sub>2</sub> and NP-Ru/CeO<sub>2</sub>.

**Table S1.** ICP-OES study and physiochemical properties for all the samples.

| Catalyst                          | Ru content (wt%) <sup>[a]</sup> | S <sub>BET</sub><br>(m <sup>2</sup> /g) <sup>[b]</sup> | Pore volume<br>(cm <sup>3</sup> /g) <sup>[b]</sup> |
|-----------------------------------|---------------------------------|--------------------------------------------------------|----------------------------------------------------|
| CeO <sub>2</sub>                  | 0                               | 73.3                                                   | 0.044                                              |
| Ru <sub>1</sub> /CeO <sub>2</sub> | 1.04                            | 105.5                                                  | 0.074                                              |
| NP-Ru/CeO <sub>2</sub>            | 1.06                            | 58.9                                                   | 0.040                                              |

<sup>[a]</sup> The Ru content was determined by ICP-OES. <sup>[b]</sup> The surface area and pore volume were measured by N<sub>2</sub> adsorption-desorption isotherm.

**Table S2.** Structural parameters extracted from Ru K-edge XAFS fitting.

| Samples                           | Shell | CN <sup>[a]</sup> | R (Å) <sup>[b]</sup> | $\sigma^2$ ( $10^{-3}$ Å <sup>2</sup> ) <sup>[c]</sup> | $\Delta E_0$ (eV) <sup>[d]</sup> | R-factor (%) <sup>[e]</sup> |
|-----------------------------------|-------|-------------------|----------------------|--------------------------------------------------------|----------------------------------|-----------------------------|
| Ru foil                           | Ru-Ru | 12                | 2.67±0.003           | 3.0±0.5                                                | 4.6±0.7                          | 0.9                         |
| RuO <sub>2</sub>                  | Ru-O  | 6                 | 1.96                 | /                                                      | /                                | /                           |
|                                   | Ru-Ru | 2                 | 3.11                 | /                                                      | /                                | /                           |
| NP-Ru/CeO <sub>2</sub>            | Ru-O  | 4.5±0.6           | 1.94±0.01            | 4.2±1.9                                                | -3.9±1.8                         | 2.1                         |
|                                   | Ru-Ru | 2.2±0.6           | 3.14±0.05            | 5.0±1.9                                                | -3.9±1.8                         |                             |
| Ru <sub>1</sub> /CeO <sub>2</sub> | Ru-O  | 4.1±0.9           | 1.95±0.02            | 5.9±3.1                                                | 3.0±2.8                          | 1.4                         |
|                                   | Ru-Ru | /                 | /                    | /                                                      | /                                |                             |

<sup>[a]</sup> CN, coordination number. <sup>[b]</sup> R, distance between absorber and backscatter atoms. <sup>[c]</sup>  $\sigma^2$ , Debye–Waller-factor to account for both thermal disorder and structural disorder. <sup>[d]</sup>  $\Delta E_0$ , inner potential correction to account for the differences in the inner potential between the sample and the reference compound. <sup>[e]</sup> R-Factor (%) indicates the goodness of the fit. The obtained  $S_0^2$  of Ru foil was 0.75 and it was fixed in the subsequent fitting of Ru foil K-edge data for the catalyst.

**Table S3.** Surface properties for CeO<sub>2</sub>, Ru<sub>1</sub>/CeO<sub>2</sub> and NP-Ru/CeO<sub>2</sub>.

| Entry | Catalyst                          | O <sub>β</sub> /(O <sub>α</sub> +O <sub>β</sub> ) <sup>[a]</sup> | EPR ratio <sup>[b]</sup> | I <sub>D</sub> /I <sub>F<sub>2g</sub></sub> <sup>[c]</sup> |
|-------|-----------------------------------|------------------------------------------------------------------|--------------------------|------------------------------------------------------------|
| 1     | CeO <sub>2</sub>                  | 0.37                                                             | 1                        | 0.0145                                                     |
| 2     | Ru <sub>1</sub> /CeO <sub>2</sub> | 0.44                                                             | 1.66                     | 0.0568                                                     |
| 3     | NP-Ru/CeO <sub>2</sub>            | 0.67                                                             | 1.99                     | 0.0811                                                     |

<sup>[a]</sup> Determined from the XPS in O 1s region. <sup>[b]</sup> Determined from the EPR spectra, we set the integrated area (in the range from 2.003-2.030) of CeO<sub>2</sub> as 1, the EPR ratio was calculated based on the integrated area of Ru<sub>1</sub>/CeO<sub>2</sub> and NP-Ru/CeO<sub>2</sub> divide the integrated area of CeO<sub>2</sub>. <sup>[c]</sup> Determined from Raman spectra.

**Table S4.** Recently reported Ru-based catalysts for CB catalytic oxidation.

| Catalysts                             | GHSV (mL/g h) and CB Conc. (ppm) | $T_{50} / T_{90}$ (°C) | Rate at 200 °C (mmol/(g h)) | Ru content (wt.%) | TOFs at 200 °C ( $\text{h}^{-1}$ ) | Ref.             |
|---------------------------------------|----------------------------------|------------------------|-----------------------------|-------------------|------------------------------------|------------------|
| <b>Ru<sub>1</sub>/CeO<sub>2</sub></b> | <b>30000, 1000</b>               | <b>192/220</b>         | <b>0.83</b>                 | <b>1.04</b>       | <b>8.07</b>                        | <b>this work</b> |
| <b>NP-Ru/CeO<sub>2</sub></b>          | <b>30000, 1000</b>               | <b>202/227</b>         | <b>0.55</b>                 | <b>1.06</b>       | <b>5.28</b>                        | <b>this work</b> |
| Ru/Fe <sub>1</sub> Mn <sub>2</sub>    | 20000, 600                       | 158/197                | 0.53                        | 0.94              | 5.70                               | 1                |
| 0.05P/RuCe                            | 15000, 217                       | 175/250                | 0.09                        | 0.75              | 1.27                               | 2                |
| Ru/SnO <sub>2</sub>                   | 30000, 1000                      | 280/310                | 0.03                        | 1.21              | 0.22                               | 3                |
| 1%Ru/TiO <sub>2</sub>                 | 60000, 500                       | 275/287                | 0.01                        | 1.00              | 0.14                               | 4                |
| Ru <sub>5</sub> /Ti-350               | 60000, 500                       | 240/260                | 0.16                        | 4.83              | 0.34                               | 5                |
| 1Ru-5Ce/TiO <sub>2</sub>              | 60000, 500                       | 258/283                | 0.07                        | 0.50              | 1.35                               | 6                |
| 1%Ru/Ti <sub>5</sub> Ce <sub>95</sub> | 12000, 550                       | 187/224                | 0.20                        | 1.15              | 1.73                               | 7                |
| 1%Ru/SBA-15                           | 12000, 550                       | 312/350                | 0.01                        | 1.00              | 0.06                               | 8                |
| Ru/CeO <sub>2</sub> -r                | 30000, 1000                      | 230/280                | 0.28                        | 0.38              | 7.48                               | 9                |
| 1%Ru-CeO <sub>2</sub>                 | 12000, 550                       | 205/248                | 0.13                        | 0.58              | 2.26                               | 10               |
| Ru/CeO <sub>2</sub>                   | 60000, 1000                      | 250/280                | 0.03                        | 0.80              | 0.34                               | 11               |

**Table S5.** Qualitative analyses of the byproducts in the off-gases from the CB oxidation over Ru<sub>1</sub>/CeO<sub>2</sub> and NP-Ru/CeO<sub>2</sub> samples.

| No. | Molecular formula                                             | Molecular structure                                                                 | Compound name                    |
|-----|---------------------------------------------------------------|-------------------------------------------------------------------------------------|----------------------------------|
| 1   | CO <sub>2</sub>                                               | CO <sub>2</sub>                                                                     | carbon dioxide                   |
| 2   | C <sub>2</sub> H <sub>2</sub> O <sub>3</sub>                  | 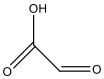   | 2-oxoacetic acid                 |
| 3   | C <sub>6</sub> H <sub>12</sub> Cl <sub>2</sub> O <sub>2</sub> |    | 1,1-dichloro-2,2-dimethoxyethane |
| 4   | HCl                                                           | HCl                                                                                 | chlorine hydride                 |
| 5   | C <sub>6</sub> H <sub>5</sub> Cl                              |    | chlorobenzene                    |
| 6   | C <sub>3</sub> H <sub>5</sub> Cl <sub>3</sub> O               |    | 1,1,1-trichloropropan-2-ol       |
| 7   | C <sub>5</sub> H <sub>8</sub> O <sub>4</sub>                  |  | dimethyl malonate                |
| 8   | C <sub>6</sub> H <sub>4</sub> Cl <sub>2</sub>                 |  | 1,3-dichlorobenzene              |
| 9   | C <sub>6</sub> H <sub>4</sub> Cl <sub>2</sub>                 |  | 1,4-dichlorobenzene              |
| 10  | C <sub>6</sub> H <sub>4</sub> Cl <sub>2</sub>                 |  | 1,2-dichlorobenzene              |
| 11  | C <sub>9</sub> H <sub>10</sub> O                              |  | 2,4-dimethylbenzaldehyde         |
| 12  | C <sub>6</sub> H <sub>3</sub> Cl <sub>3</sub>                 |  | 1,3,5-trichlorobenzene           |
| 13  | C <sub>6</sub> H <sub>3</sub> Cl <sub>3</sub>                 |  | 1,2,4-trichlorobenzene           |
| 14  | C <sub>9</sub> H <sub>10</sub> O                              |  | 3,4-dimethylbenzaldehyde         |
| 15  | C <sub>6</sub> H <sub>2</sub> Cl <sub>4</sub>                 |  | 1,2,4,5-tetrachlorobenzene       |



## References

1. G. Wang, Y. Wang, L. Qin, B. Zhao, L. Guo and J. Han, *Catal. Sci. Technol.*, 2020, **10**, 7203-7216.
2. Q. Dai, K. Shen, W. Deng, Y. Cai, J. Yan, J. Wu, L. Guo, R. Liu, X. Wang and W. Zhan, *Environ. Sci. Technol.*, 2021, **55**, 4007-4016.
3. J. Zhao, W. Xi, C. Tu, Q. Dai and X. Wang, *Appl. Catal. B: Environ.*, 2020, **263**, 118237.
4. X. Liu, L. Chen, T. Zhu and R. Ning, *J. Hazard. Mater.*, 2019, **363**, 90-98.
5. J. Wang, H. Zhao, X. Liu, W. Xu, Y. Guo, J. Song and T. Zhu, *Catal. Lett.*, 2019, **149**, 2004-2014.
6. M. Ye, L. Chen, X. Liu, W. Xu, T. Zhu and G. Chen, *Catalysts*, 2018, **8**, 116.
7. Q. Dai, S. Bai, J. Wang, M. Li, X. Wang and G. Lu, *Appl. Catal. B: Environ.*, 2013, **142-143**, 222-233.
8. Q. Dai, S. Bai, X. Wang and G. Lu, *Appl. Catal. B: Environ.*, 2013, **129**, 580-588.
9. H. Huang, Q. Dai and X. Wang, *Appl. Catal. B: Environ.*, 2014, **158-159**, 96-105.
10. Q. Dai, S. Bai, Z. Wang, X. Wang and G. Lu, *Appl. Catal. B: Environ.*, 2012, **126**, 64-75.
11. X. Lv, M. Jiang, J. Chen, D. Yan and H. Jia, *Appl. Catal. B: Environ.*, 2022, **315**, 121592.
